# Supplementary material for: Systematic analysis of the relationship between ovarian cancer prognosis and alternative splicing
Source: J Ovarian Res. 2021 Sep 15;14:120. doi: 10.1186/s13048-021-00866-1 (PMC8442315; doi:10.1186/s13048-021-00866-1)
Supplement: Supplementary file 3 — Additional file 3: Table 3. Prognostic model of AA events in ovarian cancer.coef is the risk factor. [file 13048_2021_866_MOESM3_ESM.xlsx]

## Sheet: Sheet1
id	coef	HR	HR.95L	HR.95H	pvalue
TSEN54|43456|AA	-34.3083	1.25917e-15	1.5422e-21	1.02808e-09	7.82375e-07
ZDHHC6|13114|AA	-5.03127	0.00653049	0.000178328	0.239151	0.00616765
DEF8|38185|AA	-9.1032	0.000111309	1.61534e-07	0.0766998	0.0063321
FCGR3A|8675|AA	-2.7213	0.0657891	0.0099227	0.436192	0.00480821
INPP5K|38319|AA	-3.6429	0.0261764	0.00274092	0.249991	0.00155576
SIDT2|18890|AA	-5.56905	0.0038141	1.72196e-05	0.844813	0.0432623
NCAPH2|62842|AA	4.93321	138.824	1.97849	9740.85	0.0229318
PRKCSH|47709|AA	-5.85437	0.00286735	0.000209889	0.0391715	1.14066e-05
EEF1B2|57137|AA	-1.2022	0.300533	0.0860846	1.0492	0.0594747
DPP3|17040|AA	-2.76182	0.0631764	0.00437614	0.912049	0.0426063
ACIN1|26704|AA	6.9744	1068.92	29.9721	38121.5	0.000130992
MUTYH|2671|AA	2.2024	9.04669	1.07756	75.9516	0.042481
MYL6B|22373|AA	-4.01604	0.0180241	0.000160125	2.02884	0.0956318
RHBDF1|32791|AA	-7.22241	0.000730041	9.03416e-06	0.0589939	0.00126859
GRAMD3|73159|AA	-44.6065	4.24285e-20	4.18373e-32	4.30281e-08	0.00156429
MUTYH|2669|AA	1.05043	2.85889	1.16803	6.99745	0.0214451
LILRB5|51850|AA	1.22883	3.41722	1.35754	8.60186	0.009082
