# Supplementary material for: Systematic analysis of the relationship between ovarian cancer prognosis and alternative splicing
Source: J Ovarian Res. 2021 Sep 15;14:120. doi: 10.1186/s13048-021-00866-1 (PMC8442315; doi:10.1186/s13048-021-00866-1)
Supplement: Supplementary file 17 — Additional file 17: Table 17. Single factor independent analysis of ovarian cancer.The 95% confidence interval from HR.95L to HR.95H.P value less than 0.05 indicates that this factor is significant as an independent prognostic factor for ovarian cancer. [file 13048_2021_866_MOESM17_ESM.xlsx]

## Sheet: uniCox
id	HR	HR.95L	HR.95H	pvalue
age	1.01642	1.00319	1.02983	0.0148163
grade	1.29877	0.882055	1.91237	0.185425
stage	1.20836	0.891214	1.63837	0.223037
riskScore	1.04879	1.03399	1.0638	5.06103e-11
