# Supplementary material for: Systematic analysis of the relationship between ovarian cancer prognosis and alternative splicing
Source: J Ovarian Res. 2021 Sep 15;14:120. doi: 10.1186/s13048-021-00866-1 (PMC8442315; doi:10.1186/s13048-021-00866-1)
Supplement: Supplementary file 18 — Additional file 18: Table 18. Multi-factor independent prognostic analysis of ovarian cancer.The 95% confidence interval from HR.95L to HR.95H.P value less than 0.05 indicates that this factor is significant as an independent prognostic factor for ovarian cancer. [file 13048_2021_866_MOESM18_ESM.xlsx]

## Sheet: multiCox
id	HR	HR.95L	HR.95H	pvalue
age	1.01546	1.00209	1.02902	0.0233051
grade	1.24465	0.841219	1.84155	0.273549
stage	1.16944	0.853504	1.60231	0.329995
riskScore	1.04734	1.03289	1.062	6.76098e-11
